# Supplementary material for: A practical tool for maximal information coefficient analysis
Source: PubMed Central journal article supplement (PMC5893960; doi:10.1093/gigascience/giy032), 2018-04-02
Supplement: giy032_response_to_reviewer_comments_revision_1.pdf [file giy032_response_to_reviewer_comments_revision_1.pdf]

## Author's Response To Reviewer Comments

00000000-0000-0

2Qb+maKCZMJzc

E2A9317A

n4zmM09W/sBD1

Close

>The main issue is to incorporate the data DOI into the "Availability of supporting data section", mentioning that code snapshots and tabular test data is available in the GigaScience GigaDB repository. You then need to cite the dataset (probably as reference 25) and include the following citation in the references:

>Albanese, D; Riccadonna, S; Donati, C; Franceschi, P (2018): Supporting data for "A practical tool for Maximal Information Coefficient analysis" GigaScience Database. <http://dx.doi.org/10.5524/100427>

We added the required reference and changed the text accordingly.

Close
